# Supplementary material for: Physical activity and sedentary behaviour in daily life: A comparative analysis of the Global Physical Activity Questionnaire (GPAQ) and the SenseWear armband
Source: PubMed Central journal article supplement (PMC5433749; doi:10.1371/journal.pone.0177765), 2017-05-16
Supplement: pone.0177765.s002.pdf [file pone.0177765.s002.pdf]

**S1 Table Characteristics of volunteers enrolled in 1) the PASTA online survey in all cities 2) the PASTA online survey in Antwerp (ANT), Barcelona (BCN) and London (LDN) only 3) the study using wearables (all participants and each city separately).** Physical activity variables of the online survey sample are derived from the GPAQ asking about general behaviour. PA variables of the subset enrolled in the study using wearables are derived from the GPAQ asking about activities during their measurement week.

|                                     |                   | <b>PASTA online survey</b> | <b>PASTA online survey ANT,BCN,LDN</b> | <b>Subset used for analysis ANT, BCN, LDN</b> | <b>Subset used for analysis ANT</b> | <b>Subset used for analysis BCN</b> | <b>Subset used for analysis LDN</b> |
|-------------------------------------|-------------------|----------------------------|----------------------------------------|-----------------------------------------------|-------------------------------------|-------------------------------------|-------------------------------------|
| <b>n</b>                            |                   | 10693*                     | 4618*                                  | 122                                           | 41                                  | 41                                  | 40                                  |
| <b>Males</b>                        | %                 | 46                         | 43                                     | 45                                            | 56                                  | 39                                  | 40                                  |
| <b>Higher education</b>             | %                 | 78                         | 86                                     | 89                                            | 90                                  | 90                                  | 88                                  |
| <b>Age (mean ± sd)</b>              | years             | 40 ± 13                    | 39 ± 13                                | 35 ± 10                                       | 37 ± 11                             | 34 ± 9                              | 35 ± 10                             |
| <b>Reported BMI (mean ± sd)</b>     | kg/m <sup>2</sup> | 24 ± 4                     | 24 ± 4                                 | 23 ± 3                                        | 23 ± 3                              | 23 ± 3                              | 22 ± 3                              |
| <b>MVPA EE (median (IQR))</b>       | METminutes /week  | 2820 (1560-4857)           | 2720 (1468-4717)                       | 2029 (1112-3237)                              | 1972 (1251-3271)                    | 1600 (1000-2232)                    | 2523 (1408-3334)                    |
| <b>Moderate EE (median (IQR))</b>   | METminutes /week  | 960 (360-2280)             | 960 (240-2160)                         | 720 (310-1268)                                | 360 (120-850)                       | 760 (413-1213)                      | 870 (560-1580)                      |
| <b>Vigorous EE (median (IQR))</b>   | METminutes /week  | 1440 (320-2880)            | 1410 (272-2796)                        | 1057 (321-2169)                               | 1632 (752-2285)                     | 408 (107-1387)                      | 1184 (147-2330)                     |
| <b>MVPA (median (IQR))</b>          | minutes/day       | 73 (40-129)                | 69 (39-122)                            | 53 (33-78)                                    | 46 (31-78)                          | 43 (30-66)                          | 64 (40-90)                          |
| <b>Moderate MVPA (median (IQR))</b> | minutes/day       | 34 (13-81)                 | 34 (9-77)                              | 26 (11-45)                                    | 13 (4-30)                           | 27 (15-43)                          | 31 (20-56)                          |
| <b>Vigorous MVPA (median (IQR))</b> | minutes/day       | 26 (6-54)                  | 26 (6-51)                              | 22 (6-40)                                     | 30 (15-43)                          | 9 (2-28)                            | 23 (3-45)                           |
| <b>SB (median (IQR))</b>            | minutes/day       | 480 (330-600)              | 480 (330-600)                          | 535 (420-635)                                 | 460 (390-580)                       | 590 (480-720)                       | 520 (415-600)                       |

MVPA = moderate to vigorous physical activity, EE = energy expenditure, SB = sedentary behaviour

\* cleaned data
