# Supplementary material for: Physical activity and sedentary behaviour in daily life: A comparative analysis of the Global Physical Activity Questionnaire (GPAQ) and the SenseWear armband
Source: PubMed Central journal article supplement (PMC5433749; doi:10.1371/journal.pone.0177765), 2017-05-16
Supplement: pone.0177765.s004.pdf [file pone.0177765.s004.pdf]

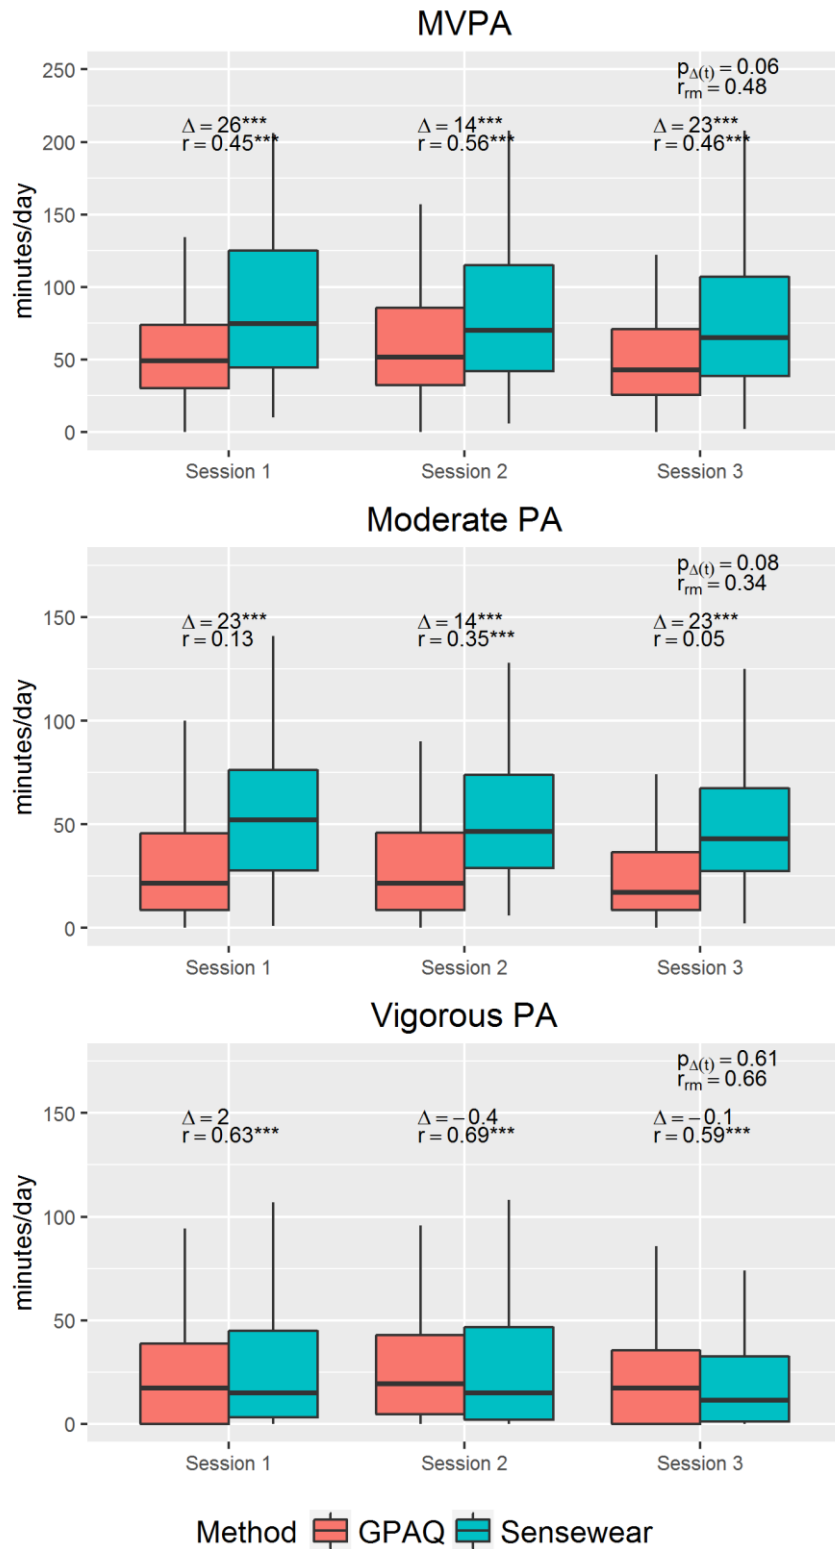

**S1 Fig Boxplots of MVPA time, moderate time and vigorous time per measurement method and session.**  $\Delta$  = the mean difference between both methods per session (tested for significance using the Wilcoxon signed rank sum test);  $r$  = the Spearman correlation coefficient per session;  $r_m$  = the overall Spearman correlation adjusted for repeated measures (rm);  $p_{\Delta(t)}$  = the p-value of the effect of session in the  $\Delta(t)$  model which indicates if the difference between GPAQ and SenseWear measurements changes over time or sessions. Statistical significance is expressed as \* $p < 0.05$ , \*\* $p < 0.01$ , and \*\*\*  $p < 0.001$
