# Supplementary material for: Physical activity and sedentary behaviour in daily life: A comparative analysis of the Global Physical Activity Questionnaire (GPAQ) and the SenseWear armband
Source: PubMed Central journal article supplement (PMC5433749; doi:10.1371/journal.pone.0177765), 2017-05-16
Supplement: pone.0177765.s005.pdf [file pone.0177765.s005.pdf]

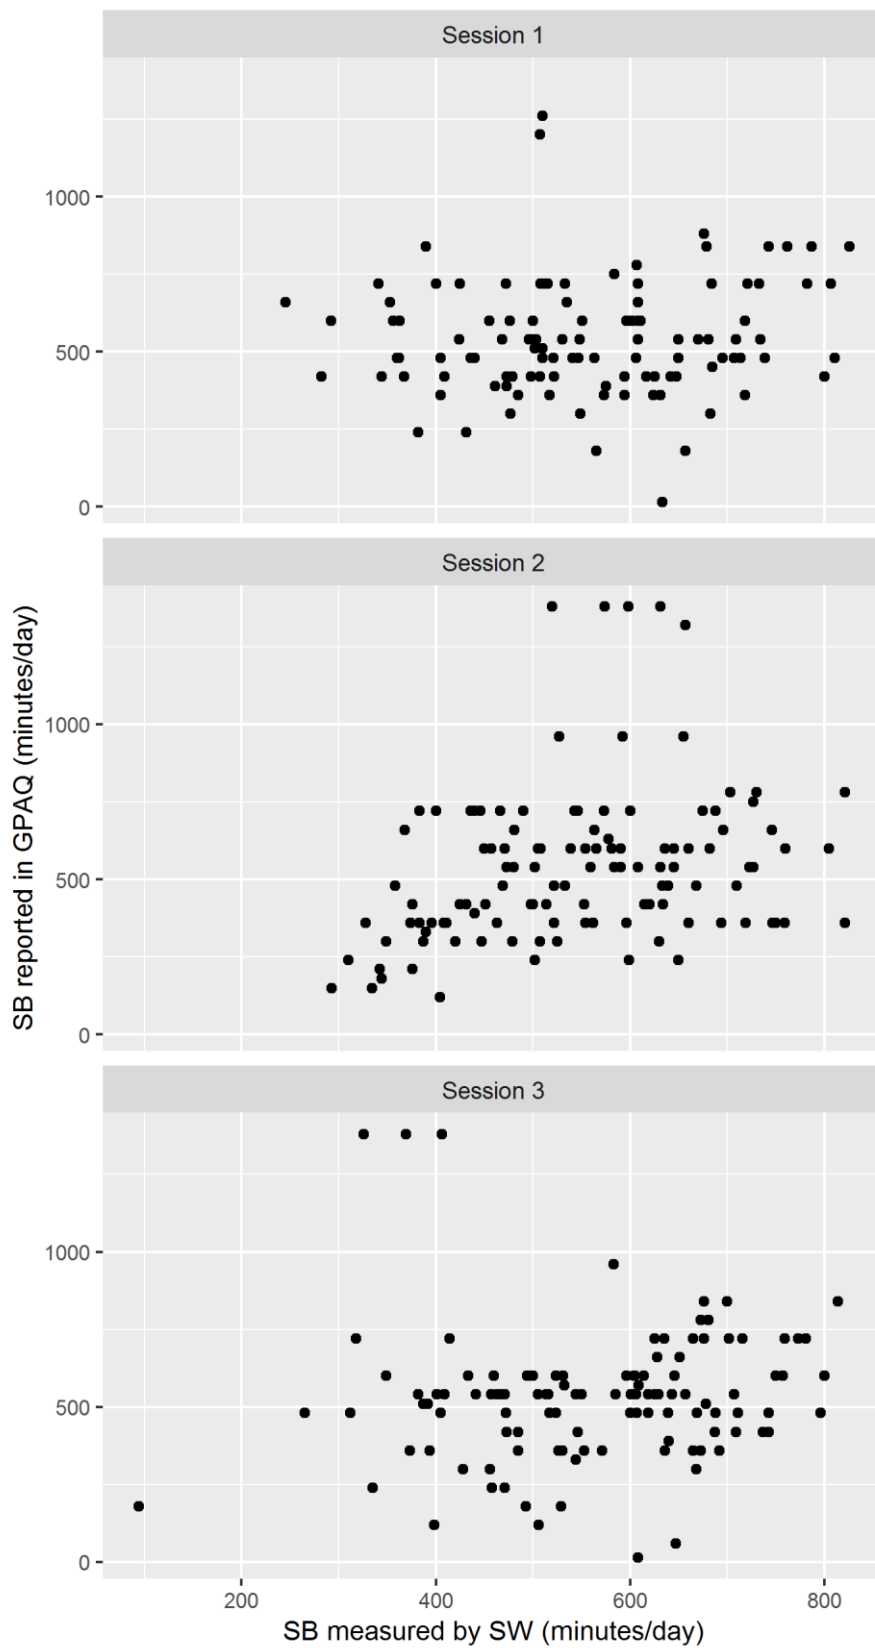

**S2 Fig Sedentary minutes measured by the GPAQ in function of SB measured by the SenseWear.** The Spearman correlation coefficients for session 1, session 2 and session 3 are respectively 0.09, 0.25 and 0.24 (overall rrm = 0.12). SW = SenseWear
