# Supplementary material for: Physical activity and sedentary behaviour in daily life: A comparative analysis of the Global Physical Activity Questionnaire (GPAQ) and the SenseWear armband
Source: PLoS One. 2017 May 16;12(5):e0177765. doi: 10.1371/journal.pone.0177765 (PMC5433749; doi:10.1371/journal.pone.0177765)
Supplement: S1 Dataset — –Demographic information was not added due to privacy concerns. (XLSX) [file pone.0177765.s001.xlsx]

## Sheet: dataset
userid	session	metmin_sens	mvpa_sens	mod_metmin_sens	vig_metmin_sens	mod_sens	vig_sens	metmin_gpaq	mvpa_gpaq	mod_metmin_gpaq	vig_metmin_gpaq	mod_gpaq	vig_gpaq
1068	3	1626.99	56	1626.99	0	56	0	5572	151.429	2800	2772	100	51.4286
1068	2	2120.9	62	1718.45	402.454	55	7	4560	120.714	2080	2480	74.2857	46.4286
1068	1	1885.12	60	1559.26	325.867	55	5	3400	85.7143	1280	2120	45.7143	40
1083	2	3134.43	67	878.677	2255.75	25	41	1080	26.4286	340	740	12.1429	14.2857
1083	1	5221.26	111	1540.37	3680.89	44	66	2380	54.2857	600	1780	21.4286	32.8571
1083	3	3373.08	79	1970.89	1402.2	53	25	1516	35	300	1216	10.7143	24.2857
1092	1	5033.9	133	3052.95	1980.95	94	39	6160	134.286	1360	4800	48.5714	85.7143
1092	2	3918.41	93	1490.63	2427.78	46	47	3000	68.5714	840	2160	30	38.5714
1092	3	5111.65	108	747.744	4363.9	24	84	5820	122.143	1020	4800	36.4286	85.7143
1103	3	3244.4	96	2857.71	386.693	87	8	1104	31.4286	560	544	20	11.4286
1103	2	2808.12	76	2241.74	566.384	63	12	2824	66.4286	560	2264	20	46.4286
1103	1	3083.02	85	2209.04	873.984	64	20	2392	64.2857	1040	1352	37.1429	27.1429
1109	1	6945.44	182	2870.65	4074.79	88	94	1632	34.2857	0	1632	0	34.2857
1109	2	5447.44	143	2703.95	2743.48	77	66	2920	62.8571	200	2720	5.71429	57.1429
1109	3	7230.02	189	4379.12	2850.9	122	66	3220	71.4286	500	2720	14.2857	57.1429
1112	1	7485.25	195	4719	2766.24	130	65	2280	51.4286	240	2040	8.57143	42.8571
1112	3	5066.33	138	4539.25	527.085	125	12	2888	62.8571	200	2688	7.14286	55.7143
1112	2	4449.12	118	2919.18	1529.94	82	35	2220	49.2857	180	2040	6.42857	42.8571
1117	3	6734.66	158	2725.21	4009.45	76	81	1952	40.7143	220	1732	7.85714	32.8571
1117	2	3819.37	87	1228.93	2590.44	35	51	3424	91.4286	1480	1944	52.8571	38.5714
1117	1	6608.35	154	3494.73	3113.62	97	57	NA	NA	NA	NA	NA	NA
1120	1	1956.02	59	1956.02	0	59	0	2154	66.4286	1440	714	51.4286	15
1120	2	1241.42	39	1241.42	0	39	0	834	19.2857	120	714	4.28571	15
1120	3	1069.16	36	1069.16	0	36	0	794	17.8571	80	714	2.85714	15
1137	1	1304.97	32	408.563	896.405	13	19	272	5.71429	0	272	0	5.71429
1137	3	1368.8	36	977.654	391.15	28	8	204	4.28571	0	204	0	4.28571
1137	2	521.938	15	390.724	131.214	12	3	272	5.71429	0	272	0	5.71429
1184	2	2932.16	89	2111.11	821.052	73	16	2040	53.5714	960	1080	34.2857	19.2857
1184	3	3685.11	112	3367.18	317.929	105	7	2540	73.5714	1580	960	56.4286	17.1429
1184	1	3725.22	104	2713.36	1011.86	83	21	2040	60	1320	720	47.1429	12.8571
1188	3	68.4699	2	68.4699	0	2	0	1320	47.1429	1320	0	47.1429	0
1188	2	226.058	6	226.058	0	6	0	720	25.7143	720	0	25.7143	0
1188	1	320.684	11	320.684	0	11	0	800	28.5714	800	0	28.5714	0
1197	1	560.714	19	560.714	0	19	0	840	30	840	0	30	0
1215	1	1094.48	33	1000.34	94.1423	31	2	360	12.8571	360	0	12.8571	0
1215	3	1650.58	47	1139.05	511.523	35	12	360	12.8571	360	0	12.8571	0
1215	2	229.19	7	229.19	0	7	0	480	17.1429	480	0	17.1429	0
1227	3	4463.82	127	3745.92	717.904	113	14	2080	65.7143	1600	480	57.1429	8.57143
1227	1	3381.05	106	3238.7	142.343	102	3	2040	64.2857	1560	480	55.7143	8.57143
1227	2	2765.76	87	2765.76	0	87	0	1320	47.1429	1320	0	47.1429	0
1235	3	1830.05	58	1830.05	0	58	0	2640	81.4286	1920	720	68.5714	12.8571
1235	2	2013.01	67	2013.01	0	67	0	1680	60	1680	0	60	0
1235	1	2098.47	61	1752.2	346.278	53	8	3360	120	3360	0	120	0
1249	3	8843.25	208	5261.38	3581.87	134	74	2280	51.4286	240	2040	8.57143	42.8571
1249	1	9325.45	196	2030.89	7294.56	52	144	2040	42.8571	0	2040	0	42.8571
1249	2	11754.9	278	7287.42	4467.53	190	88	816	17.1429	0	816	0	17.1429
1270	1	7389.18	170	2226.27	5162.91	62	107	6096	117.143	80	6016	2.85714	114.286
1270	2	4127.32	86	559.45	3567.87	18	68	4300	84.2857	0	4300	0	84.2857
1270	3	5615.85	146	4142.9	1472.94	114	32	4384	80	0	4384	0	80
1273	2	1479.86	39	1161.14	318.719	32	6	480	8.57143	0	480	0	8.57143
1273	1	4129.03	105	2959.96	1169.07	81	24	1360	31.4286	400	960	14.2857	17.1429
1273	3	3385.23	85	2462.53	922.699	66	19	360	12.8571	360	0	12.8571	0
1293	3	8091.39	174	2410.09	5681.29	65	109	3100	65.7143	40	3060	1.42857	64.2857
1293	1	8518.04	206	2937.94	5580.1	85	120	3752	80	80	3672	2.85714	77.1429
1293	2	10287.2	208	539.781	9747.45	14	194	NA	NA	NA	NA	NA	NA
1316	1	1979.27	54	1349.07	630.191	41	12	2188	45.7143	120	2068	4.28571	41.4286
1316	3	1896.85	49	1563.69	333.152	43	6	1670	35.7143	180	1490	6.42857	29.2857
1316	2	785.845	24	785.845	0	24	0	1752	38.5714	120	1632	4.28571	34.2857
1327	1	5610.74	130	1225.03	4385.72	37	93	2520	60	480	2040	17.1429	42.8571
1327	2	5696.28	136	1700.63	3995.65	52	84	2280	51.4286	240	2040	8.57143	42.8571
1327	3	4538.48	114	2059.85	2478.62	62	51	1116	25.7143	300	816	8.57143	17.1429
1328	2	7403.32	204	6143.9	1259.42	175	28	736	24.2857	600	136	21.4286	2.85714
1328	1	5999.38	163	4276.26	1723.12	126	37	2952	81.4286	1320	1632	47.1429	34.2857
1328	3	6361.84	158	3060.03	3301.81	91	67	2568	51.4286	240	2328	8.57143	42.8571
1338	3	1641.23	47	1145.53	495.703	36	10	960	25.7143	480	480	17.1429	8.57143
1338	1	1863.22	53	1391.63	471.589	41	11	600	21.4286	600	0	21.4286	0
1338	2	2814.55	80	1706.35	1108.2	55	25	1760	45.7143	800	960	28.5714	17.1429
1346	3	681.143	21	544.348	136.796	17	3	626	17.8571	320	306	11.4286	6.42857
1346	2	952.06	28	804.15	147.91	25	3	1532	50.7143	1260	272	45	5.71429
1346	1	1587.13	48	1392.18	194.946	43	4	1008	30	600	408	21.4286	8.57143
1360	2	300.241	9	240.838	59.4032	8	1	1200	42.8571	1200	0	42.8571	0
1360	3	916.662	29	916.662	0	29	0	640	22.8571	640	0	22.8571	0
1360	1	674.55	21	674.55	0	21	0	1800	64.2857	1800	0	64.2857	0
1372	2	3490.53	118	3490.53	0	118	0	1020	21.4286	0	1020	0	21.4286
1372	3	2784.7	84	2526.36	258.345	78	6	1020	21.4286	0	1020	0	21.4286
1372	1	3735.55	118	3479.68	255.878	112	6	1020	21.4286	0	1020	0	21.4286
1391	2	7436.09	178	2900.89	4535.2	92	86	12468	338.571	6240	6228	222.857	115.714
1391	1	3427.67	73	509.04	2918.63	16	57	4228	118.571	2160	2068	77.1429	41.4286
1391	3	5242.25	108	545.703	4696.55	17	91	8776	251.429	4800	3976	171.429	80
1405	1	3276.2	91	2229.11	1047.09	67	24	1640	31.4286	0	1640	0	31.4286
1405	2	1683.22	40	412.982	1270.24	11	29	2112	42.8571	0	2112	0	42.8571
1405	3	1189.99	38	1189.99	0	38	0	0	0	0	0	0	0
1417	3	10875.2	189	1621.1	9254.14	45	144	4968	111.429	480	4488	17.1429	94.2857
1417	1	7648.68	132	944.257	6704.42	26	105	3712	88.5714	720	2992	25.7143	62.8571
1417	2	9796.7	167	1101.49	8695.22	29	137	4500	105.714	760	3740	27.1429	78.5714
1421	2	6145.01	169	3111.92	3033.09	108	61	12780	302.857	3160	9620	112.857	190
1421	3	2727.23	75	1827.42	899.809	55	19	1768	45.7143	720	1048	25.7143	20
1421	1	2212.37	71	1947.21	265.159	66	5	2212	52.1429	540	1672	19.2857	32.8571
1430	3	3028.35	65	1158.59	1869.76	35	30	1344	27.8571	180	1164	6.42857	21.4286
1430	1	2358.52	54	608.765	1749.75	21	33	720	17.1429	240	480	8.57143	8.57143
1430	2	5224.12	94	541.821	4682.3	14	79	4912	93.5714	40	4872	1.42857	92.1429
1621	3	545.11	16	485.926	59.1843	15	1	0	0	0	0	0	0
1621	1	5487.33	133	2641.86	2845.47	74	59	5104	97.1429	0	5104	0	97.1429
1621	2	5753.64	133	1593.52	4160.13	45	88	4708	90	80	4628	2.85714	87.1429
1674	3	195.034	6	195.034	0	6	0	272	5.71429	0	272	0	5.71429
1674	1	1013.35	26	369.803	643.545	13	13	1048	21.4286	80	968	2.85714	18.5714
1674	2	327.858	11	327.858	0	11	0	408	8.57143	0	408	0	8.57143
1694	1	3332.4	76	970.324	2362.07	27	48	2808	81.4286	1560	1248	55.7143	25.7143
1694	2	3953.13	92	1761.42	2191.71	51	40	5000	157	3600	1400	128.571	28.4286
1694	3	4772.29	117	1699.22	3073.07	51	66	NA	NA	NA	NA	NA	NA
1740	2	5644.01	149	3708.75	1935.26	112	37	1106	22.1429	80	1026	2.85714	19.2857
1740	1	4813.82	129	3346.98	1466.84	100	28	866	17.8571	80	786	2.85714	15
1740	3	6665.95	183	5545.98	1119.97	160	23	564	12.8571	120	444	4.28571	8.57143
1874	3	3013.32	70	1199.89	1813.43	32	38	810	15	0	810	0	15
1874	2	2984.21	69	720.321	2263.89	20	48	2352	50	280	2072	10	40
1874	1	4163.46	100	2179.78	1983.68	62	38	2032	44.2857	280	1752	10	34.2857
1984	1	767.45	22	679.308	88.1418	20	2	952	20	0	952	0	20
1984	3	2208.32	72	2208.32	0	72	0	720	25.7143	720	0	25.7143	0
1984	2	1845.4	54	1321.47	523.938	42	12	NA	NA	NA	NA	NA	NA
2049	1	1597.38	53	1418.51	178.867	48	4	1680	60	1680	0	60	0
2049	2	2112.22	50	1272.57	839.655	36	13	6600	227.143	6120	480	218.571	8.57143
2049	3	2806.18	83	2278.53	527.654	74	9	3060	105	2820	240	100.714	4.28571
2095	2	2623.37	67	1742.17	881.2	49	18	2432	55.7143	400	2032	14.2857	41.4286
2095	3	1714.9	43	813.835	901.067	23	20	1472	41.4286	800	672	28.5714	12.8571
2095	1	3155.16	86	1785.15	1370.01	54	32	2400	51.4286	240	2160	8.57143	42.8571
2118	3	2364.99	58	1076.52	1288.48	35	23	2880	64.2857	720	2160	25.7143	38.5714
2145	3	1516.61	46	1516.61	0	46	0	2748	72.8571	1080	1668	38.5714	34.2857
2145	2	2424.77	64	1680.75	744.02	46	17	3586	103.571	1920	1666	68.5714	35
2145	1	2470.27	76	2384.83	85.44	74	2	2908	74.2857	1000	1908	35.7143	38.5714
2163	2	5152.54	128	2894.53	2258.01	81	46	4398	92.1429	600	3798	21.4286	70.7143
2163	3	2997.7	79	2069.52	928.185	58	21	2520	51.4286	360	2160	12.8571	38.5714
2163	1	4510.54	118	2838.76	1671.78	81	36	3120	90	1920	1200	68.5714	21.4286
2175	1	996.475	29	901.224	95.2517	26	2	1248	28.5714	160	1088	5.71429	22.8571
2175	3	651.75	21	651.75	0	21	0	1056	25.7143	240	816	8.57143	17.1429
2175	2	624.536	18	624.536	0	18	0	1360	28.5714	0	1360	0	28.5714
2194	3	1162.76	38	1162.76	0	38	0	280	10	280	0	10	0
2194	1	2711.18	81	2329.36	381.815	73	7	840	30	840	0	30	0
2194	2	1754.11	55	1650.23	103.883	53	2	840	30	840	0	30	0
2203	1	2953.61	75	1693.07	1260.54	49	25	1080	30	600	480	21.4286	8.57143
2203	2	1387.09	46	1387.09	0	46	0	840	30	840	0	30	0
2203	3	1569.77	44	1265.44	304.322	37	6	1200	42.8571	1200	0	42.8571	0
2244	2	4143.25	96	1596.77	2546.48	46	50	3160	77.8571	840	2320	30	47.8571
2244	3	2336.07	65	1523.48	812.592	47	18	1840	52.8571	1120	720	40	12.8571
2244	1	3841.74	92	1360.9	2480.84	41	51	2616	71.4286	1120	1496	40	31.4286
2262	2	3001.55	65	812.675	2188.87	28	37	1568	40	480	1088	17.1429	22.8571
2262	1	1350.25	29	367.695	982.553	10	18	1836	38.5714	0	1836	0	38.5714
2262	3	1271.67	28	376.363	895.309	8	19	2040	42.8571	0	2040	0	42.8571
2285	1	1661.03	34	41.5731	1619.45	1	32	2740	77.8571	1380	1360	49.2857	28.5714
2285	2	5645.05	122	1868.99	3776.05	47	75	5296	117.143	1120	4176	40	77.1429
2285	3	2443.07	54	901.952	1541.11	24	30	1720	40	400	1320	14.2857	25.7143
2291	1	3487.14	102	3038.59	448.555	92	10	102	2.14286	0	102	0	2.14286
2291	3	1070.38	31	1070.38	0	31	0	NA	NA	NA	NA	NA	NA
2291	2	1957.25	59	1604.85	352.398	51	8	NA	NA	NA	NA	NA	NA
2298	3	3758.35	116	3500.48	257.872	110	5	2460	68.5714	1200	1260	42.8571	25.7143
2298	1	6245.45	156	2690.63	3554.82	77	78	2068	50	480	1588	17.1429	32.8571
2298	2	5025.76	133	3161.43	1864.33	92	41	1872	40	200	1672	7.14286	32.8571
2339	3	4616.19	111	833.874	3782.32	24	86	5914	165.714	2820	3094	100.714	65
2339	2	5684.25	127	1292.03	4392.22	38	89	8808	248.571	4320	4488	154.286	94.2857
2339	1	4633.64	102	572.831	4060.81	17	85	8360	228.571	3600	4760	128.571	100
2357	2	2749.9	81	2503.58	246.322	75	6	2040	60	1320	720	47.1429	12.8571
2357	3	2837.75	80	2275.15	562.598	70	10	2220	53.5714	780	1440	27.8571	25.7143
2357	1	3187.08	84	2674.97	512.112	75	8	2400	51.4286	480	1920	17.1429	34.2857
2461	3	1571.44	54	1571.44	0	54	0	960	34.2857	960	0	34.2857	0
2461	2	3811.37	114	2348.85	1462.52	80	33	2032	68.5714	1760	272	62.8571	5.71429
2461	1	2887.87	98	2710.1	177.766	94	4	1320	47.1429	1320	0	47.1429	0
2480	1	1326.78	40	926.687	400.091	30	9	0	0	0	0	0	0
2480	2	679.101	21	679.101	0	21	0	1920	68.5714	1920	0	68.5714	0
2480	3	414.869	14	414.869	0	14	0	1080	38.5714	1080	0	38.5714	0
2538	1	910.555	31	910.555	0	31	0	2040	72.8571	2040	0	72.8571	0
2538	3	480.862	17	480.862	0	17	0	1020	36.4286	1020	0	36.4286	0
2538	2	964.602	33	964.602	0	33	0	1200	38.5714	960	240	34.2857	4.28571
2683	2	2432.82	63	1814.63	618.193	49	14	950	22.8571	240	710	8.57143	14.2857
2683	3	2553.93	65	1136.62	1417.3	33	31	1256	32.8571	440	816	15.7143	17.1429
2683	1	3160.79	83	1776.07	1384.72	52	30	1040	27.1429	360	680	12.8571	14.2857
2752	3	5287.93	116	1731.65	3556.28	47	68	1640	31.4286	0	1640	0	31.4286
2752	1	7346.15	197	5493.46	1852.69	155	41	120	4.28571	120	0	4.28571	0
2752	2	5292.58	129	2298.56	2994.03	64	65	1620	32.1429	180	1440	6.42857	25.7143
2757	2	378.93	12	378.93	0	12	0	160	2.85714	0	160	0	2.85714
2757	3	632.08	22	632.08	0	22	0	40	1.42857	40	0	1.42857	0
2757	1	434.254	15	434.254	0	15	0	480	8.57143	0	480	0	8.57143
2788	1	1338	40	1202.49	135.507	36	3	1096	37.1429	960	136	34.2857	2.85714
2788	3	2514.18	82	2514.18	0	82	0	1200	42.8571	1200	0	42.8571	0
2788	2	3782.01	106	2994.69	787.328	88	18	1500	38.5714	480	1020	17.1429	21.4286
2823	1	2115.56	68	1813.25	302.318	61	7	1200	42.8571	1200	0	42.8571	0
2823	2	1322	42	1322	0	42	0	1200	42.8571	1200	0	42.8571	0
2823	3	369.213	12	369.213	0	12	0	444	12.8571	240	204	8.57143	4.28571
2841	2	1105.7	33	928.503	177.2	29	4	1020	21.4286	0	1020	0	21.4286
2841	1	2331.39	67	1559.56	771.834	49	18	1800	49.2857	780	1020	27.8571	21.4286
2841	3	1529.08	47	1286.67	242.41	41	5	816	17.1429	0	816	0	17.1429
2858	3	1481.68	44	1481.68	0	44	0	960	25.7143	480	480	17.1429	8.57143
2858	1	1923.56	54	1861.03	62.5252	53	1	1760	54.2857	1280	480	45.7143	8.57143
2858	2	1743.92	52	1560.22	183.704	47	4	1520	45.7143	1040	480	37.1429	8.57143
2865	1	6418.09	168	3989.84	2428.25	116	52	1380	49.2857	1380	0	49.2857	0
2865	3	3452.86	99	2745.58	707.279	82	16	2400	85.7143	2400	0	85.7143	0
2865	2	2243.8	70	2243.8	0	70	0	1920	68.5714	1920	0	68.5714	0
2874	3	2438.66	60	690.44	1748.22	21	39	1848	45	420	1428	15	30
2874	1	1603.28	45	1089.48	513.798	34	11	1296	34.2857	480	816	17.1429	17.1429
2874	2	1592.3	45	931.015	661.286	30	14	1296	34.2857	480	816	17.1429	17.1429
2896	3	1650.55	49	1526.28	124.262	46	3	2064	40	80	1984	2.85714	37.1429
2896	2	5212.72	146	4402.61	810.104	128	18	3908	92.8571	1040	2868	37.1429	55.7143
2896	1	5176.02	143	3617.38	1558.64	110	32	4176	98.5714	1200	2976	42.8571	55.7143
2924	3	NA	NA	NA	NA	NA	NA	300	10.7143	300	0	10.7143	0
2924	1	2410.9	74	2137.99	272.909	68	6	1128	34.2857	720	408	25.7143	8.57143
2924	2	1725.69	57	1475.13	250.558	51	5	1264	35.7143	700	564	25	10.7143
2940	1	1411.84	46	1411.84	0	46	0	4560	111.429	1680	2880	60	51.4286
2940	2	3037.07	67	1105.43	1931.64	37	30	4080	102.857	1680	2400	60	42.8571
2940	3	1781.13	40	853.815	927.32	27	13	4080	102.857	1680	2400	60	42.8571
2955	2	2610.68	82	2311.34	299.344	74	7	600	21.4286	600	0	21.4286	0
2955	3	761.561	23	697.855	63.7063	21	1	1464	34.2857	240	1224	8.57143	25.7143
2955	1	691.59	22	630.804	60.7855	20	1	600	21.4286	600	0	21.4286	0
2963	3	10733.2	271	7311.47	3421.75	199	72	3080	100	2400	680	85.7143	14.2857
2963	2	10997.7	267	6122.38	4875.27	164	102	12160	414.286	10800	1360	385.714	28.5714
2963	1	10246.7	278	7900.72	2346.01	230	48	9064	315.714	8520	544	304.286	11.4286
2965	1	4607.3	120	2268.73	2338.57	68	51	1360	30.7143	300	1060	10.7143	20
2965	2	2766.46	79	2177.58	588.879	66	12	240	8.57143	240	0	8.57143	0
2965	3	5075.03	130	2742.24	2332.79	79	51	708	19.2857	300	408	10.7143	8.57143
2976	2	1078.87	38	1078.87	0	38	0	9520	220	1360	8160	48.5714	171.429
2976	1	2398.58	85	2260.98	137.595	82	3	8960	200	800	8160	28.5714	171.429
2976	3	2887.63	88	2065.45	822.179	69	18	2536	71.4286	1440	1096	51.4286	20
2981	3	4346.98	117	2941.58	1405.4	87	29	1920	42.8571	480	1440	17.1429	25.7143
2981	2	1944.87	49	1181.28	763.593	36	13	1920	49.2857	840	1080	30	19.2857
2981	1	1068.33	30	821.589	246.744	25	5	960	34.2857	960	0	34.2857	0
2983	3	2619.27	73	1692.55	926.718	52	21	3920	71.4286	80	3840	2.85714	68.5714
2983	2	2764.39	85	2475.02	289.372	79	5	2960	54.2857	80	2880	2.85714	51.4286
2983	1	2003.2	65	1917.79	85.412	63	2	NA	NA	NA	NA	NA	NA
2989	3	1504.78	42	1109.69	395.085	34	8	480	17.1429	480	0	17.1429	0
2989	2	1352.43	38	936.905	415.528	29	8	1680	60	1680	0	60	0
2989	1	2487.21	78	2246.5	240.709	72	5	3360	120	3360	0	120	0
3096	3	6868.74	198	4522.09	2346.65	143	54	1632	34.2857	0	1632	0	34.2857
3096	1	4845.63	137	3273.05	1572.58	100	36	1632	34.2857	0	1632	0	34.2857
3096	2	4335.76	120	3062.83	1272.93	92	28	2280	51.4286	240	2040	8.57143	42.8571
3286	3	4161.97	98	2160.06	2001.9	58	40	1270	28.5714	180	1090	6.42857	22.1429
3286	1	7127.95	160	1995.82	5132.13	55	105	1050	21.4286	60	990	2.14286	19.2857
3286	2	621.013	11	235.655	385.358	6	5	2280	42.8571	120	2160	4.28571	38.5714
3314	2	1517.99	41	1141.04	376.944	32	9	512	18.2857	512	0	18.2857	0
3314	3	707.31	23	607.136	100.174	21	2	320	11.4286	320	0	11.4286	0
3314	1	1923.77	50	595.344	1328.42	20	29	2160	77.1429	2160	0	77.1429	0
3330	1	2484.86	90	2484.86	0	90	0	300	10.7143	300	0	10.7143	0
3330	3	967.743	33	910.434	57.3088	32	1	544	11.4286	0	544	0	11.4286
3330	2	1126.29	41	1126.29	0	41	0	400	14.2857	400	0	14.2857	0
3429	3	6370.38	151	3406.8	2963.58	92	59	3684	75	300	3384	10.7143	64.2857
3429	1	6996.16	164	3001.28	3994.88	85	79	7576	194.286	2800	4776	100	94.2857
3429	2	6723.58	169	4641.44	2082.14	126	43	7264	175.714	2240	5024	80	95.7143
3497	1	1571.95	46	1571.95	0	46	0	840	30	840	0	30	0
3497	3	1634.14	46	1479.7	154.438	42	3	1020	36.4286	1020	0	36.4286	0
3497	2	1532.68	48	1532.68	0	48	0	1320	47.1429	1320	0	47.1429	0
3509	3	5406.06	157	4146.23	1259.83	129	28	2560	82.8571	2080	480	74.2857	8.57143
3509	2	9247.07	256	6685.18	2561.89	196	60	3960	141.429	3960	0	141.429	0
3509	1	10216.6	289	8913.02	1303.63	259	30	8100	246.429	5700	2400	203.571	42.8571
3517	1	8169.96	194	3252.54	4917.42	90	103	9084	235.714	3360	5724	120	115.714
3517	3	1104.84	35	1104.84	0	35	0	1200	42.8571	1200	0	42.8571	0
3517	2	4222.26	107	1988.58	2233.68	56	50	4176	90	360	3816	12.8571	77.1429
3675	2	569.96	18	569.96	0	18	0	300	10.7143	300	0	10.7143	0
3675	1	1391.07	46	1333.34	57.7264	45	1	300	10.7143	300	0	10.7143	0
3675	3	1119.69	35	1119.69	0	35	0	NA	NA	NA	NA	NA	NA
3684	2	4573.02	131	3576.65	996.366	110	20	4084	139.286	3680	404	131.429	7.85714
3684	1	4494.94	133	4156.37	338.571	127	5	2840	95.7143	2520	320	90	5.71429
3684	3	3806.51	106	2415.95	1390.56	74	32	2224	58.5714	840	1384	30	28.5714
3690	1	2545.51	65	1350.53	1194.98	41	23	4900	108.571	1000	3900	35.7143	72.8571
3690	3	1070.68	28	484.483	586.197	15	12	2168	45.7143	320	1848	11.4286	34.2857
3690	2	1437.49	36	552.513	884.977	16	20	1504	34.2857	320	1184	11.4286	22.8571
3698	1	4784.57	126	2780.15	2004.42	79	47	1200	42.8571	1200	0	42.8571	0
3698	3	5038.84	123	2030.32	3008.52	56	67	6960	248.571	6960	0	248.571	0
3698	2	2913.17	76	1629.68	1283.5	47	29	NA	NA	NA	NA	NA	NA
3710	2	7327.15	191	2781.44	4545.71	86	104	3240	85.7143	1200	2040	42.8571	42.8571
3710	1	5762.31	157	4681.9	1080.42	132	25	2960	65.7143	240	2720	8.57143	57.1429
3710	3	3207.36	88	2495.42	711.942	72	16	2496	57.1429	320	2176	11.4286	45.7143
3846	2	6982.98	139	914.297	6068.69	23	115	5510	123.571	600	4910	21.4286	102.143
3846	3	2938.54	75	1665.45	1273.09	46	28	1800	64.2857	1800	0	64.2857	0
3846	1	7412.09	148	1005.56	6406.52	26	122	3540	81.4286	480	3060	17.1429	64.2857
3902	2	5157.18	112	1496.08	3661.09	40	72	2176	45.7143	0	2176	0	45.7143
3902	1	4941.67	119	1908.78	3032.89	57	62	5128	127.143	1320	3808	47.1429	80
3902	3	6028.03	130	990.533	5037.5	28	102	5128	110	360	4768	12.8571	97.1429
3937	1	774.218	26	702.524	71.6934	24	1	800	28.5714	800	0	28.5714	0
3937	2	583.312	20	583.312	0	20	0	500	17.8571	500	0	17.8571	0
3937	3	698.469	23	698.469	0	23	0	600	21.4286	600	0	21.4286	0
4107	1	2000.71	64	2000.71	0	64	0	1640	58.5714	1640	0	58.5714	0
4107	3	1983.77	62	1716.88	266.89	55	6	300	10.7143	300	0	10.7143	0
4107	2	3331.02	100	3242.57	88.4459	98	2	2320	82.8571	2320	0	82.8571	0
4231	2	4237.37	97	844.529	3392.84	25	72	2688	60	240	2448	8.57143	51.4286
4231	1	4112.53	125	3495.28	617.25	111	14	3696	120	2880	816	102.857	17.1429
4231	3	3788.02	93	1065.93	2722.09	32	60	NA	NA	NA	NA	NA	NA
4251	1	269.106	10	269.106	0	10	0	0	0	0	0	0	0
4251	3	464.788	16	464.788	0	16	0	560	14.2857	240	320	8.57143	5.71429
4251	2	552.843	21	552.843	0	21	0	0	0	0	0	0	0
4286	2	3159.14	85	2365.34	793.805	68	16	3684	100.714	1920	1764	68.5714	32.1429
4286	3	2499.74	64	1275.87	1223.87	38	25	3852	120	2760	1092	98.5714	21.4286
4286	1	2118.26	53	917.834	1200.43	28	25	2456	63.5714	1020	1436	36.4286	27.1429
4715	2	4366.6	115	2681.14	1685.47	75	39	4240	136.429	3400	840	121.429	15
4715	3	1728.21	39	718.968	1009.25	22	17	3160	101.429	2520	640	90	11.4286
4715	1	7083.04	180	5208.43	1874.61	141	38	NA	NA	NA	NA	NA	NA
5040	2	7389.4	168	2873.34	4516.06	79	89	5760	145.714	2400	3360	85.7143	60
5040	1	2428.88	70	2244.2	184.673	66	4	1040	28.5714	560	480	20	8.57143
5040	3	1507.57	45	1366.55	141.02	42	3	120	4.28571	120	0	4.28571	0
5074	2	4341.55	112	1642.63	2698.92	53	59	2144	48.5714	240	1904	8.57143	40
5074	1	6441.96	162	2557.57	3884.39	76	86	3456	81.4286	600	2856	21.4286	60
5074	3	5820.89	143	2555.98	3264.91	72	70	3580	86.4286	840	2740	30	56.4286
5083	2	7477.34	171	2149.44	5327.9	62	108	4368	85.7143	0	4368	0	85.7143
5083	3	6128.47	124	780.248	5348.22	23	100	3000	60	0	3000	0	60
5083	1	5969.72	127	1170.73	4798.99	33	93	3528	72.8571	120	3408	4.28571	68.5714
5134	2	4599.02	118	2922.65	1676.37	85	33	2480	70	1320	1160	47.1429	22.8571
5134	3	2678.96	69	2184.63	494.331	58	11	2576	54.2857	320	2256	11.4286	42.8571
5134	1	3897.09	95	1701.76	2195.33	49	46	1640	40	480	1160	17.1429	22.8571
5139	1	4162.9	101	1185.09	2977.81	37	63	1632	34.2857	0	1632	0	34.2857
5139	2	4817.59	115	1726.88	3090.71	51	63	1872	42.8571	240	1632	8.57143	34.2857
5139	3	3054.49	99	3054.49	0	99	0	840	30	840	0	30	0
5140	2	2200.51	56	1049.09	1151.42	29	26	1120	40	1120	0	40	0
5140	1	1946.11	53	1636.57	309.539	46	7	1200	34.2857	720	480	25.7143	8.57143
5140	3	2302.87	62	1335.87	966.997	39	23	1800	47.1429	840	960	30	17.1429
5267	1	1283.99	42	1283.99	0	42	0	1680	60	1680	0	60	0
5267	3	631.592	21	631.592	0	21	0	1320	47.1429	1320	0	47.1429	0
5267	2	1362.51	43	1304.88	57.6316	42	1	3600	107.143	2400	1200	85.7143	21.4286
5295	3	548.961	17	416.969	131.992	14	3	2350	61.4286	820	1530	29.2857	32.1429
5295	2	477.464	13	422.757	54.707	11	1	2196	51.4286	360	1836	12.8571	38.5714
5295	1	652.381	18	388.74	263.641	12	6	1900	47.8571	540	1360	19.2857	28.5714
5409	2	3520.32	109	3443.61	76.7106	107	1	1720	56.4286	1440	280	51.4286	5
5409	3	NA	NA	NA	NA	NA	NA	4020	90	480	3540	17.1429	72.8571
5409	3	6799.94	165	2259.25	4540.69	69	96	1780	43.5714	420	1360	15	28.5714
5419	2	6351.57	165	3880.33	2471.24	113	51	2790	60	300	2490	10.7143	49.2857
5419	3	5628.4	138	3449.95	2178.45	100	37	2120	44.2857	240	1880	8.57143	35.7143
5419	1	5196.31	128	3173.04	2023.27	88	40	2800	58.5714	240	2560	8.57143	50
5435	2	2728.71	67	938.7	1790.01	29	37	2072	51.4286	640	1432	22.8571	28.5714
5435	3	NA	NA	NA	NA	NA	NA	1236	35	640	596	22.8571	12.1429
5435	3	3586.26	80	581.668	3004.59	15	64	4580	100	600	3980	21.4286	78.5714
5559	2	1687.12	44	1026.05	661.067	30	13	480	11.4286	160	320	5.71429	5.71429
5559	1	2479.03	69	1762.69	716.334	53	16	600	21.4286	600	0	21.4286	0
5559	3	2285.47	61	1506.34	779.13	44	17	920	32.8571	920	0	32.8571	0
5583	2	5597.36	117	1197.07	4400.29	36	80	4130	89.2857	480	3650	17.1429	72.1429
5583	1	4232.75	90	1013.12	3219.63	26	63	2088	48.5714	320	1768	11.4286	37.1429
5583	3	4380.51	101	1124.05	3256.45	33	67	3584	82.8571	720	2864	25.7143	57.1429
5688	2	1575.69	49	1503.94	71.7553	47	1	1920	55.7143	1200	720	42.8571	12.8571
5688	1	1162.44	30	643.146	519.294	19	10	960	20	160	800	5.71429	14.2857
5688	3	1406.15	45	1337.45	68.7077	43	1	60	2.14286	60	0	2.14286	0
5811	2	2464.57	59	1310.86	1153.71	36	22	2600	62.8571	560	2040	20	42.8571
5811	3	2599.38	67	2137.99	461.396	57	10	1880	47.1429	520	1360	18.5714	28.5714
5811	1	706.581	18	327.868	378.713	9	8	2292	57.8571	660	1632	23.5714	34.2857
6003	1	1928.29	62	1809.72	118.57	59	3	1200	25.7143	240	960	8.57143	17.1429
6003	3	1910.04	56	1910.04	0	56	0	3142	76.4286	1120	2022	40	36.4286
6003	2	2653.63	85	2320.75	332.885	77	7	2880	68.5714	960	1920	34.2857	34.2857
6004	3	2145.12	67	1922.17	222.951	61	5	188	5.71429	120	68	4.28571	1.42857
6004	2	3515.82	102	2875.39	640.427	92	10	2120	58.5714	1160	960	41.4286	17.1429
6004	1	938.534	30	868.622	69.912	28	1	60	2.14286	60	0	2.14286	0
6072	2	820.279	24	634.947	185.332	20	4	240	8.57143	240	0	8.57143	0
6072	3	926.497	26	717.757	208.74	21	4	420	15	420	0	15	0
6072	1	614.385	18	614.385	0	18	0	120	4.28571	120	0	4.28571	0
6102	2	2116.01	60	1798.68	317.332	52	7	1600	57.1429	1600	0	57.1429	0
6102	3	3176.25	91	2715.81	460.438	81	10	2880	102.857	2880	0	102.857	0
6343	3	1141.82	35	815.519	326.298	27	8	7920	231.429	5040	2880	180	51.4286
6343	2	378.194	12	260.463	117.731	9	2	1296	34.2857	480	816	17.1429	17.1429
6343	1	1374.76	38	1082.44	292.318	31	7	3288	60	0	3288	0	60
6741	2	12046.9	227	1362.37	10684.5	38	188	5040	102.857	0	5040	0	102.857
6741	1	8275.98	176	2666.3	5609.68	70	106	4476	117.857	1620	2856	57.8571	60
6741	3	7627.08	159	1520.25	6106.83	41	117	3650	77.8571	80	3570	2.85714	75
6765	2	376.376	14	376.376	0	14	0	480	17.1429	480	0	17.1429	0
6765	3	1053.84	38	1053.84	0	38	0	2280	55.7143	840	1440	30	25.7143
6765	1	731.196	24	670.169	61.0273	23	1	1800	51.4286	1080	720	38.5714	12.8571
7004	3	2218.1	70	2074.95	143.152	66	3	10080	180	0	10080	0	180
7004	2	6946.53	164	2368.27	4578.26	76	87	7020	201.429	6060	960	184.286	17.1429
7004	1	2248.2	49	466.926	1781.28	15	34	1800	51.4286	1800	0	51.4286	0
7062	3	2368.42	69	2254.32	114.101	66	2	1288	40	880	408	31.4286	8.57143
7062	1	1899.72	58	1899.72	0	58	0	1492	44.2857	880	612	31.4286	12.8571
7062	2	994.299	31	994.299	0	31	0	752	22.8571	480	272	17.1429	5.71429
7198	2	3758.91	86	1471.53	2287.38	53	32	1800	47.1429	840	960	30	17.1429
7198	1	711.178	26	711.178	0	26	0	840	30	840	0	30	0
7198	3	2943.8	59	711.531	2232.26	24	34	2280	55.7143	840	1440	30	25.7143
7592	2	2335.83	70	2335.83	0	70	0	2622	92.1429	2520	102	90	2.14286
7592	1	1225.42	37	1137.87	87.5521	35	2	1240	44.2857	1240	0	44.2857	0
7592	3	1531.01	46	1416.45	114.553	43	2	1600	57.1429	1600	0	57.1429	0
7593	2	2147.7	67	2028.5	119.198	65	2	5736	192.857	4920	816	175.714	17.1429
7593	1	1178.37	37	1178.37	0	37	0	840	30	840	0	30	0
7593	3	1175.27	38	1001.93	173.337	34	3	720	25.7143	720	0	25.7143	0
